# Supplementary material for: Cloning of Thalassiosira pseudonana’s Mitochondrial Genome in Saccharomyces cerevisiae and Escherichia coli
Source: MDPI journal article supplement (doi:10.3390/biology9110358), 2020-10-26
Supplement: s1 [file s1]

# Cloning of *Thalassiosira pseudonana*'s mitochondrial genome in *Saccharomyces cerevisiae* and *Escherichia coli*

Ryan R. Cochrane<sup>1</sup>, Stephanie L. Brumwell<sup>1</sup>, Arina Shrestha<sup>1</sup>, Daniel J. Giguere<sup>1</sup>, Samir Hamadache<sup>1</sup>, Gregory B. Gloor<sup>1</sup>, David R. Edgell<sup>1</sup>, and Bogumil J. Karas<sup>1\*</sup>.

<sup>1</sup>Department of Biochemistry, Schulich School of Medicine and Dentistry, The University of Western Ontario, London, N6A 5C1, Ontario, Canada

\*Correspondence: bkaras@uwo.ca

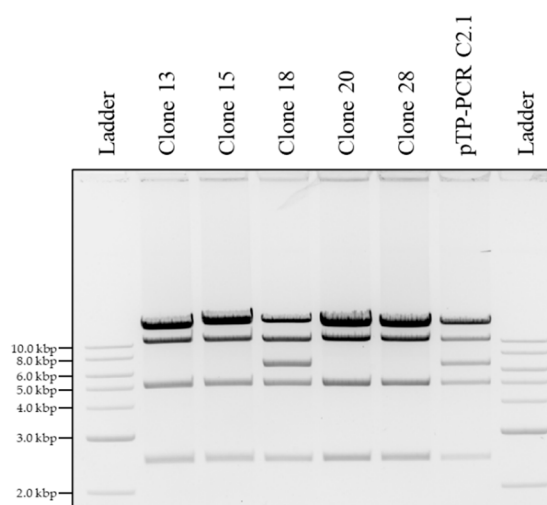

**Supplementary Figure S1.** PvuI restriction digest of five mutated pTP-PCR C2.1 clones from the plasmid stability assay (Figure 4) and pTP-PCR C2.1 (control). Band sizes of 6, 2454, 4863, 6262, 12869, 15404, and 15749 bp are expected. Notes: 1 – Mutated pTP-PCR C2.1 clones 13, 15, 20, and 28 show incorrect restriction pattern confirming the result from the multiplex PCR experiment; 2 - The 6 bp band is not visible in this gel.

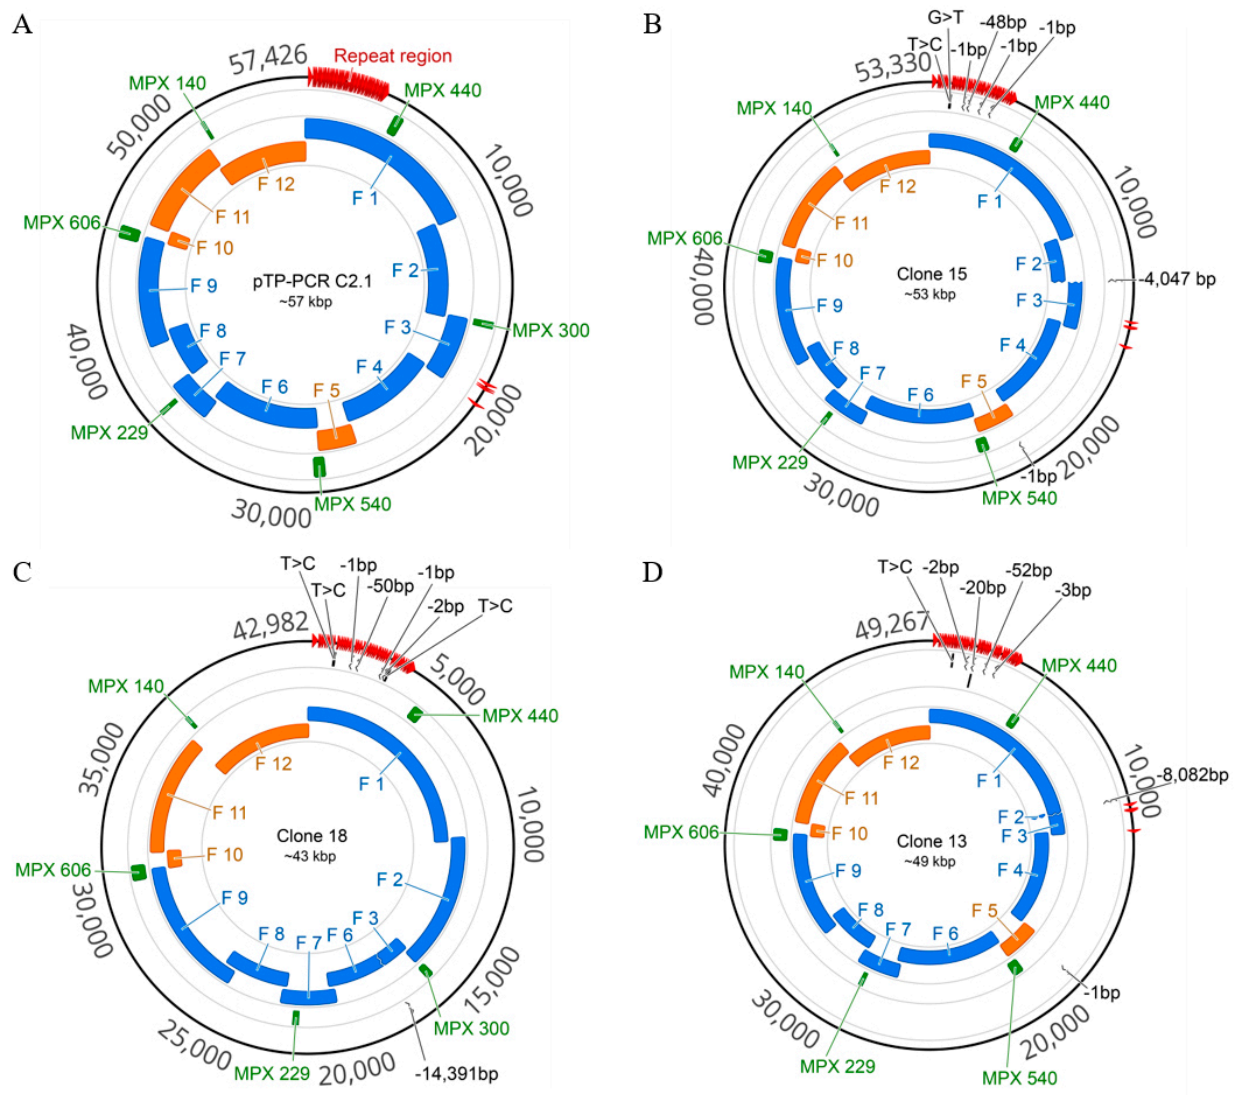

**Supplementary Figure S2.** Sequencing analysis of mutated pTP-PCR C2.1 clones 13, 15, and 18 identified after propagation in *E. coli*. **A)** Plasmid map of reference sequence, pTP-PCR C2.1, prior to plasmid stability assay (Figure 4) experiment. **B-D)** Plasmid maps of clones 13, 15, and 18 with mutations identified after next generation sequencing displayed. For all plasmid maps the relative sizes and positions of the mitochondrial genome fragments (blue), plasmid backbone fragments (orange), and repetitive sequences (red) are shown. The six multiplex PCR amplicons used for diagnostic screening and their sizes in bp are indicated (green). These images were generated using Geneious version 2020.2.4, created by Biomatters. Notes: 1 – in both **B)** and **D)** a deletion in fragments 2 and 3 resulted in the absent 300 bp multiplex amplicon; 2 – in **C)** a deletion spanning between fragments 3 and 6 resulted in the absent 540 bp multiplex amplicon.

**Supplementary Table S1.** Primers used in the cloning and screening of all *T. pseudonana* mitochondrial genomes cloned.

| Name                                                                                | Primers                                                                                                                                                                                                                              | Length (bp) |
|-------------------------------------------------------------------------------------|--------------------------------------------------------------------------------------------------------------------------------------------------------------------------------------------------------------------------------------|-------------|
| <b>Original Amplification of the Full <i>T. pseudonana</i> Mitochondrial Genome</b> |                                                                                                                                                                                                                                      |             |
| <b>pTP-PCR C1/2 – Design 1</b>                                                      |                                                                                                                                                                                                                                      |             |
| Fragmen t 1                                                                         | <b>P1F</b> – TTTCATTAGTTGCAGTCACTCCGCTTTGGTTTGGCGCGCCTCGAGCAACAGGGTACAACC<br><b>P1R</b> – AGCGTTAAAAAGTTTAAAAATTAGCGTATATAAAATTTATG                                                                                                  | 10735       |
| Fragmen t 2                                                                         | <b>P2F</b> – TATCTTATACAATTTTGGCTTCAGGTAACATTTTATTAT<br><b>P2R</b> – AAAAGAATTTGCCTGTATTTTAACTACAAATTATAGGAAA                                                                                                                        | 6092        |
| Fragmen t 3                                                                         | <b>P3F</b> – AATCTAAAACTATCTTACTTAAAAAACTAATTCAAATTA<br><b>P3R</b> – ATAAAATAAAAAAGTAAGCTGTCTTAAGCTTGTTTCGGC                                                                                                                         | 3610        |
| Fragmen t 4                                                                         | <b>P4F</b> – CAGGAATGTTCAATTTTGTTTTAAACAAAGTTTACCAACTTAATCCTATTATAGAAGATA<br><b>P4R</b> – GGCCTGCAACGTTTCGCTACCTTAGGACCGTTATAGTTACGTAAAGTGTTATAAATTCTAA                                                                              | 6274        |
| Fragmen t 5                                                                         | <b>P5F</b> – TGACCAAGATATAAAATACITTTAGAATTTATAACACITTTACGTAACATAACGGTCCTAA<br><b>P5R</b> – TTAAATGTTTAAATACTGAGTCGTTTAAAGTTTGGACCATCTATATTACCCTGTTATCCC                                                                              | 2152        |
| Fragmen t 6                                                                         | <b>P6F</b> – TCGTTTCATCGAGTTACGCTAGGGATAACAGGGTAATATAGATGGTCAAAACTTTAAACG<br><b>P6R</b> – TTCCTTTCCAACAACACGAAGCAAATTTTAATAATCATAAGATTATAGTGGATAATTTAG                                                                               | 7035        |
| Fragmen t 7                                                                         | <b>P7F</b> – AAAATTTAAACATTTACCCACTTTCTAGTGATATTCTTGG<br><b>P7R</b> – ATTTTGATGAGCTCTGGTTTAAATCTTTTAAACATTGC                                                                                                                         | 2512        |
| Fragmen t 8                                                                         | <b>P8F</b> – TGGTTACGATACTTTGTATAAAAAAAATTCGAGGGATGGA<br><b>P8R</b> – CGATTTATTGATAAGCAACGAGATTGGTAAATTAGGCCAC                                                                                                                       | 3250        |
| Fragmen t 9                                                                         | <b>P9F</b> – CCATACTCATTTGAATGTTTCGAGTTTATAAATTTGCCAAAAGTACTAAGTTTTAGGTCA<br><b>P9R</b> – CGCTATAATGACCCCGAAGCAGGGTTATGCAGCGGAAGATCTCGAGGCAGTTCAGATTAA                                                                               | 6216        |
| Fragmen t 10                                                                        | <b>P10F</b> – CATAAAAACAGTTCAAATAATTAATCTGAAGTGCCTCGAGATCTTCCGCTGCATAACCTT<br><b>P10R</b> – CATAGACGGCCGCCAGCCAGCGGCGAGGGCAACCAGCTCGCGATCGCGATCGTCTTGCC                                                                              | 859         |
| Fragmen t 11                                                                        | <b>P11F</b> – AGTACATCACCGACGAGCAAGGCAAGACGATCGCGATCGCGAGCTGGTTGCCCTCGCCGC<br><b>P11R</b> – CCATCTGCTCATCATCCAGCTCGCCAACAGACAACGATAATCACTTTCGGTAAGTGCAG<br><b>P12F</b> – TGACCAGGAGCTGCTTACTGAGGACGCACTGGATGATCTCATCCCTTCTTTCTACTGAC | 5367        |
| Fragmen t 12                                                                        | <b>P12R</b> – AAGTAAGGTTATAAATCATTGGTTGTACCCTGTTGCTCGAGGCGCGCCAAACCAAAGCGG                                                                                                                                                           | 5870        |
| <b>Amplification of the <i>T. pseudonana</i> Reduced Mitochondrial Genome</b>       |                                                                                                                                                                                                                                      |             |
| <b>pTP-PCR C3/4 – Design 2</b>                                                      |                                                                                                                                                                                                                                      |             |
| Fragmen t 1                                                                         | <b>P2F</b> – TATCTTATACAATTTTGGCTTCAGGTAACATTTTATTAT<br><b>P2R</b> – AAAAGAATTTGCCTGTATTTTAACTACAAATTATAGGAAA                                                                                                                        | 6092        |
| Fragmen t 2                                                                         | <b>P3F</b> – AATCTAAAACTATCTTACTTAAAAAACTAATTCAAATTA<br><b>P3R</b> – ATAAAATAAAAAAGTAAGCTGTCTTAAGCTTGTTTCGGC                                                                                                                         | 3610        |
| Fragmen t 3                                                                         | <b>P4F</b> – CAGGAATGTTCAATTTTGTTTTAAACAAAGTTTACCAACTTAATCCTATTATAGAAGATA<br><b>P13R</b> – TCGTTTAAAGTTTTGACCAATTAAGTGTTATAAATTCTAA                                                                                                  | 6254        |
| Fragmen t 4                                                                         | <b>P13F</b> – TAATAATCAATGGATTTTAAATTTAAAAACCTATAAACGTT<br><b>P6R</b> – TTCCTTTCCAACAACACGAAGCAAATTTTAATAATCATAAGATTATAGTGGATAATTTAG                                                                                                 | 7174        |
| Fragmen t 5                                                                         | <b>P17F</b> – ATAAAATTACGAAAAAGTACTACCATAACCGTCTAGTCGCT<br><b>P8R</b> – CGATTTATTGATAAGCAACGAGATTGGTAAATTAGGCCAC<br><b>P14F</b> – CCATACTCATTTGAATGTTTCGAGTTTATAAATTTGCCAA                                                           | 5417        |
| Fragmen t 6                                                                         | <b>P14R</b> – CCTAAAAGACATAGCACGCGACAAGCACGAGCGAGATATCCCAATCAAGCTAGTATCGATTAA<br>GCTTGTATAGCTTGATA                                                                                                                                   | 6372        |
| Fragmen t 7                                                                         | <b>P15F</b> – CGAGAATAAATAATATTAGTCTTTGTATTTCTTATCAAGCTATACAAGCTTAATCGATACTAG<br>CTTGATTGGGATATC<br><b>P15R</b> – AAGCTTGACCGAGAGCAATCCCGCAGTCTTCAGTGGTGTGATGGTCGTCTATGTGTAAGTCACCA<br>ATGCACTCAACGATT                               | 9136        |
| Fragmen t 8                                                                         | <b>P16F</b> – AATCGTTGAGTGCATTGGTGACTTACACATAGACGACCATCACACCACTGAAGACTGCGGGATT<br>GCTCTCGGTCAAGCTT<br><b>P16R</b> – CCTAAAAAAAATTTTGGAGAATAAGTAATATTAGTCTTTGATCGTTATTTATCAAAAACGATCG<br>TCTTGCCCTTGCTCGT                             | 8441        |

|                                                                                                |                                                                                                                    |      |
|------------------------------------------------------------------------------------------------|--------------------------------------------------------------------------------------------------------------------|------|
| <b>P18F –</b>                                                                                  |                                                                                                                    |      |
| Fragmen<br>t 9                                                                                 | GAGGCACTTCGAGCTGTAAGTACATCACCGACGAGCAAGGCAAGACGATCGTTTTTGATAAATA<br>ACGATCAAAGACTAAT                               | 6810 |
| <b>P1R – AGCGTTAAAAAGTTTAAAAATTAGCGTATATAAAATTTATG</b>                                         |                                                                                                                    |      |
| <b>Final Amplification of the <i>T. pseudonana</i> Mitochondrial Genome (pTP-PCR Design 1)</b> |                                                                                                                    |      |
| Fragmen<br>t 1                                                                                 | <b>P25F – AAAATGCATTGGGAAAAAGGTTAAATTTACCCCAACGAAA</b><br><b>P25R – GTAGAATATAAGGCTGTGGATTATGCCACAGTTTTTGCT</b>    | 5138 |
| Fragmen<br>t 2                                                                                 | <b>P26F – GTAACCAAGTATGCAGTCCCAATTGCGCAGATTTACCTAC</b><br><b>P26R – CGTTTTTTTATTAAATCTTGCAATTTACTGCAAAGCAACA</b>   | 5244 |
| Fragmen<br>t 3                                                                                 | <b>P27F – TTTGTAGTGTGCTCTTATTTTAAACAACCTTGCGGTTTT</b><br><b>P27R – CGTCACTTCCCAGATCCGCGCTTTCTCTGTCCTTCCTGTG</b>    | 5230 |
| Fragmen<br>t 4                                                                                 | <b>P28F – TAAAAAGGCCGTAATATCCAGCTGAACGGTCTGGTTATAG</b><br><b>P28R – GCTTAAGTAGACTTGAACACTACTGACCTTACGCTTATCAGG</b> | 6884 |
| Fragmen<br>t 5                                                                                 | <b>P29F – GAGGGCATCTTTTTATATTATAATAATCCCCAACCTCAA</b><br><b>P29R – ATGTGACGGGCGGTGTGTACAAAGCCAAGGTACGTATTCA</b>    | 5959 |
| Fragmen<br>t 6                                                                                 | <b>P30F – TCTTAGTTCGGATTGTAAGCTGCAACTCGTTACATGAAG</b><br><b>P30R – TTAAAGCTATAGCTTTCAATGCTGAATGATTGAAGAAGG</b>     | 5107 |
| Fragmen<br>t 7                                                                                 | <b>P31F – AATAGTGA AAAATTATGTTTTTCGAAAATTCTACAGCAGGT</b><br><b>P31R – TGTGTAAAACCTTATTTGATATTCTTTGTTTGTGTCATTG</b> | 5948 |
| Fragmen<br>t 8                                                                                 | <b>P32F – ATTGAATCGTTTTACATGCTCCAGGAATGTTCAATTTGT</b><br><b>P32R – ATATTATTTTATTGTTAAATATTTGGATTTTCCCAGCTA</b>     | 5391 |
| Fragmen<br>t 9                                                                                 | <b>P33F – AATTAGCTTCGAAATAAAACGCTAAGCCTTGAAAAGATA</b><br><b>P33R – AGTTGTCCTTTCTGGAAATCGCCATTTGGTCAGTTTTAG</b>     | 5888 |
| Fragmen<br>t 10                                                                                | <b>P34F – TACACAAAAGGGAAAGTTAACATTTTCGTAACAATGCAAA</b><br><b>P34R – CATTTACTCATGAGTTATTTGGGGTAGATTTCGTGTGATAA</b>  | 6155 |
| Fragmen<br>t 11                                                                                | <b>P35F – AGCCATAATCTGTTAAAATACGCTTTAAATTTGAGTGGTT</b><br><b>P35R – TATGATATGATAGAACATTATAAAACGGTGGAAGAGGTA</b>    | 4289 |
| <b><i>T. pseudonana</i> Diagnostic Multiplex PCR Primers</b>                                   |                                                                                                                    |      |
| Amplico<br>n 1                                                                                 | <b>P19F – GCTCACGACATCAGTTTGCT</b><br><b>P19R – TGCTGGCTTTTCAAGTTCCT</b>                                           | 140  |
| Amplico<br>n 2                                                                                 | <b>P20F – GCTTAATTCACGCTTATTGAAAA</b><br><b>P20R – ATGGCTTTGAAGGACATCCA</b>                                        | 229  |
| Amplico<br>n 3                                                                                 | <b>P21F – AGTTAAATCTATAGAAAATGCAAATTTAGTTATTAACAGT</b><br><b>P21R – AAAATAGAAATCTTTGAAAAAGTTTCTCCTGAAGTTTATGA</b>  | 300  |
| Amplico<br>n 4                                                                                 | <b>P22F – AGTTTTAATTTTTTTGCTGCTATTGTTTATTTTTTTAGC</b><br><b>P22R – CACCTAAACTAATGGGTCTAAAAATATATGATATAAGCTC</b>    | 440  |
| Amplico<br>n 5<br>(only<br>+IR)                                                                | <b>P23F – TGGCTACCCTGTGGAACACCTACATCTGTATTAAACGAAGC</b><br><b>P23R – GTTTTGGGAACAGGAAGTCATGTGTTCAAATCACATTATT</b>  | 540  |
| Amplico<br>n 6<br>(only<br>+IR)                                                                | <b>P24F – GGTCATAAGCCATATATTCAGTAGAATATAAATGTACTAT</b><br><b>P24R – AGCCGGCCAGCCTCGCAGAGCAGGATTCCCCTTGAGCACC</b>   | 606  |

**Supplementary Table S2.** List of mutations identified in cloned *T. pseudonana* mitochondrial genomes by next-generation sequencing.

| Position                              | Mutation       | Location/Gene                                | Effect     |
|---------------------------------------|----------------|----------------------------------------------|------------|
| <b>pTP-PCR C1.1</b>                   |                |                                              |            |
| <b>Reference: Supplemental File 2</b> |                |                                              |            |
| 888                                   | A > G          | Repeat region                                | Unknown    |
| 902                                   | G > A          | Repeat region                                | Unknown    |
| 1,000                                 | A > G          | Repeat region                                | Unknown    |
| 1,587                                 | 28-bp deletion | Repeat region                                | Unknown    |
| 1,879                                 | 28-bp deletion | Repeat region                                | Unknown    |
| 1,880                                 | G > C          | Repeat region                                | Unknown    |
| 2,112                                 | 9-bp deletion  | Repeat region                                | Unknown    |
| 2,890                                 | 19-bp deletion | Repeat region                                | Unknown    |
| 2,968                                 | T > C          | Repeat region                                | Unknown    |
| 3,032                                 | 19-bp deletion | Repeat region                                | Unknown    |
| 3,221                                 | A > G          | Repeat region                                | Unknown    |
| 3,623                                 | T > C          | Repeat region                                | Unknown    |
| 9,841                                 | G > A          | <i>rrnS</i>                                  | Unknown    |
| 21,950                                | G > T          | <i>rps12</i>                                 | V87>F      |
| 22,337                                | 2-bp deletion  | <i>rps7</i>                                  | Frameshift |
| 22,433                                | 1-bp deletion  | <i>rps7</i>                                  | Frameshift |
| 22,716                                | C > A          | <i>rpl14</i>                                 | Q44>K      |
| 25,274                                | G > A          | <i>tatC</i>                                  | T56>I      |
| 30,179                                | 1-bp deletion  | <i>rps19</i>                                 | Frameshift |
| 33,603                                | T > C          | <i>nad11</i>                                 | L373S      |
| 35,514                                | G > A          | <i>trnS(gct)</i>                             | Unknown    |
| 42,462                                | G > A          | <i>orf718 (cox1 intron)</i>                  | No effect  |
| 46,617                                | 2-bp deletion  | Vector backbone (intergenic)                 | No effect  |
| 56,480                                | G > A          | Vector backbone (intergenic)                 | No effect  |
| <b>pTP-PCR C2.1</b>                   |                |                                              |            |
| <b>Reference: Supplemental File 2</b> |                |                                              |            |
| 848                                   | A > G          | Repeat region                                | Unknown    |
| 862                                   | G > A          | Repeat region                                | Unknown    |
| 960                                   | A > G          | Repeat region                                | Unknown    |
| 1,549                                 | 26-bp deletion | Repeat region                                | Unknown    |
| 1,843                                 | 27-bp deletion | Repeat region                                | Unknown    |
| 1,843                                 | G > C          | Repeat region                                | Unknown    |
| 2,074                                 | 89-bp deletion | Repeat region                                | Unknown    |
| 2,385                                 | 31-bp deletion | Repeat region                                | Unknown    |
| 2,743                                 | 17-bp deletion | Repeat region                                | Unknown    |
| 2,822                                 | T > C          | Repeat region                                | Unknown    |
| 2,886                                 | 17-bp deletion | Repeat region                                | Unknown    |
| 3,077                                 | A > G          | Repeat region                                | Unknown    |
| 3,479                                 | T > C          | Repeat region                                | Unknown    |
| 9,697                                 | G > A          | <i>rrnS</i>                                  | Unknown    |
| 11,838                                | 1-bp deletion  | <i>cox3</i>                                  | Frameshift |
| 22,763                                | C > T          | <i>rpl14</i>                                 | P107>S     |
| 27,402                                | 1-bp insertion | Intergenic                                   | No effect  |
| 29,153                                | 1-bp deletion  | <i>rpl2</i>                                  | Frameshift |
| 34,681                                | 1-bp deletion  | Intergenic                                   | No effect  |
| 41,218                                | G > A          | <i>orf718 (cox1 intron)</i>                  | P388>S     |
| 44,615                                | G > A          | <i>nad5</i>                                  | No effect  |
| 46,475                                | 2-bp deletion  | Vector backbone (intergenic)                 | No effect  |
| 49,206                                | 1-bp insertion | Vector backbone (intergenic)                 | No effect  |
| <b>pTP-PCR C3.1</b>                   |                |                                              |            |
| <b>Reference: Supplemental File 3</b> |                |                                              |            |
| 1,846                                 | 1-bp deletion  | Vector backbone ( <i>S. meliloti repC2</i> ) | Frameshift |
| 7,209                                 | G > T          | Vector backbone ( <i>E. coli repE</i> )      | P103>S     |
| 21,050                                | 1-bp insertion | <i>rrnI</i>                                  | Unknown    |
| 23,484                                | G > A          | <i>rrnS</i>                                  | Unknown    |
| 24,048                                | G > A          | <i>nad6</i>                                  | M142>I     |

|        |                    |                        |            |
|--------|--------------------|------------------------|------------|
| 24,115 | T > A              | <i>nad6</i>            | L165>M     |
| 34,435 | C > G              | <i>rps4</i>            | I162>M     |
| 35,699 | 1-bp deletion      | <i>rps12</i>           | Frameshift |
| 39,198 | 1-bp deletion      | Intergenic             | No effect  |
| 40,103 | 1-bp deletion      | <i>rps11</i>           | Frameshift |
| 45,855 | 1-bp insertion     | <i>nad11</i>           | Frameshift |
| 46,604 | 10,890-bp deletion | Several coding regions | Unknown    |

**pTP-PCR C4.1**

**Reference: Supplemental File 3**

|        |               |                                              |            |
|--------|---------------|----------------------------------------------|------------|
| 7-8    | AC > TA       | Vector backbone (intergenic)                 | No effect  |
| 748    | C > T         | Vector backbone ( <i>NAT</i> )               | P50>L      |
| 2,513  | C > T         | Vector backbone ( <i>S. meliloti repC2</i> ) | R176>H     |
| 11,179 | G > A         | Vector backbone ( <i>E.coli parB</i> )       | No effect  |
| 11,228 | C > A         | Vector backbone ( <i>E. coli parB</i> )      | A146>D     |
| 18,322 | 1-bp deletion | <i>atp6</i>                                  | Frameshift |
| 23,483 | G > A         | <i>rrnS</i>                                  | Unknown    |
| 25,862 | C > T         | <i>cox3</i>                                  | No effect  |
| 33,411 | 5-bp deletion | Intergenic                                   | No effect  |
| 41,950 | C > T         | <i>rps3</i>                                  | S64>L      |
| 42,081 | 1-bp deletion | <i>rps3</i>                                  | Frameshift |
| 46,598 | G > A         | Intergenic                                   | No effect  |

**Supplementary Table S3.** Count tables for raw RNA sequencing reads for strains with either the pPT-PCR C2.1 plasmid or vector backbone alone (pPtGE31). Raw counts were enumerated by mapping against the appropriate reference and counted using HTSeq using –nonunique all mode. Three biological replicates were performed (repA, repB, repC) for each condition. Genes regions were counted for the features.

| Gene              | pPtGE31 repA | pPtGE31 repB | pPtGE31 repC | pPT-PCR C2.1<br>repA | pPT-PCR C2.1<br>repB | pPT-PCR C2.1<br>repC |
|-------------------|--------------|--------------|--------------|----------------------|----------------------|----------------------|
| <i>CAT</i>        | 2224         | 4737         | 3625         | 3395                 | 4988                 | 6646                 |
| <i>atp6</i>       | 0            | 0            | 0            | 13                   | 6                    | 18                   |
| <i>atp8</i>       | 0            | 0            | 0            | 0                    | 0                    | 0                    |
| <i>atp9</i>       | 0            | 0            | 0            | 0                    | 0                    | 0                    |
| <i>cob</i>        | 0            | 0            | 0            | 51                   | 82                   | 133                  |
| <i>cox1</i>       | 0            | 0            | 0            | 1417                 | 1576                 | 3028                 |
| <i>cox2</i>       | 0            | 0            | 0            | 4                    | 6                    | 23                   |
| <i>cox3</i>       | 0            | 0            | 0            | 12                   | 15                   | 23                   |
| <i>nad1</i>       | 0            | 0            | 0            | 7                    | 9                    | 11                   |
| <i>nad11-a</i>    | 0            | 0            | 0            | 2                    | 6                    | 7                    |
| <i>nad11-b</i>    | 0            | 0            | 0            | 8                    | 8                    | 10                   |
| <i>nad2</i>       | 0            | 0            | 0            | 25                   | 54                   | 51                   |
| <i>nad3</i>       | 0            | 0            | 0            | 1                    | 0                    | 3                    |
| <i>nad4</i>       | 0            | 0            | 0            | 8                    | 10                   | 27                   |
| <i>nad4L</i>      | 0            | 0            | 0            | 0                    | 0                    | 0                    |
| <i>nad5</i>       | 0            | 0            | 0            | 11                   | 17                   | 17                   |
| <i>nad6</i>       | 0            | 0            | 0            | 9                    | 4                    | 17                   |
| <i>nad7</i>       | 0            | 0            | 0            | 29                   | 32                   | 52                   |
| <i>nad9-rps14</i> | 0            | 0            | 0            | 4                    | 7                    | 11                   |
| <i>rRNA 1.1</i>   | 0            | 0            | 0            | 8                    | 19                   | 22                   |
| <i>rRNA 1.2</i>   | 0            | 0            | 0            | 81                   | 99                   | 165                  |
| <i>rRNA 1.3</i>   | 0            | 0            | 0            | 6                    | 7                    | 12                   |
| <i>rRNA 1.4</i>   | 0            | 0            | 0            | 38                   | 78                   | 145                  |
| <i>rpl14</i>      | 0            | 0            | 0            | 2                    | 2                    | 1                    |
| <i>rpl16</i>      | 0            | 0            | 0            | 0                    | 2                    | 3                    |
| <i>rpl2</i>       | 0            | 0            | 0            | 2                    | 0                    | 3                    |
| <i>rpl5</i>       | 0            | 0            | 0            | 0                    | 0                    | 0                    |
| <i>rpl6</i>       | 0            | 0            | 0            | 0                    | 2                    | 3                    |
| <i>rps10</i>      | 0            | 0            | 0            | 1                    | 0                    | 3                    |
| <i>rps11</i>      | 0            | 0            | 0            | 0                    | 0                    | 4                    |
| <i>rps12</i>      | 0            | 0            | 0            | 0                    | 1                    | 1                    |
| <i>rps13</i>      | 0            | 0            | 0            | 1                    | 0                    | 0                    |
| <i>rps19</i>      | 0            | 0            | 0            | 1                    | 0                    | 4                    |
| <i>rps2</i>       | 0            | 0            | 0            | 0                    | 1                    | 2                    |
| <i>rps3</i>       | 0            | 0            | 0            | 2                    | 2                    | 5                    |
| <i>rps4</i>       | 0            | 0            | 0            | 0                    | 1                    | 7                    |
| <i>rps7</i>       | 0            | 0            | 0            | 1                    | 1                    | 2                    |
| <i>rps8</i>       | 0            | 0            | 0            | 1                    | 0                    | 5                    |
| <i>tatC</i>       | 0            | 0            | 0            | 11                   | 9                    | 38                   |
| <i>trnA(ugc)</i>  | 0            | 0            | 0            | 1                    | 0                    | 0                    |
| <i>trnC(gca)</i>  | 0            | 0            | 0            | 0                    | 1                    | 0                    |
| <i>trnD(guc)</i>  | 0            | 0            | 0            | 0                    | 0                    | 0                    |
| <i>trnE(uuc)</i>  | 0            | 0            | 0            | 19                   | 33                   | 42                   |
| <i>trnF(gaa)</i>  | 0            | 0            | 0            | 1                    | 0                    | 4                    |
| <i>trnG(gcc)</i>  | 0            | 0            | 0            | 0                    | 0                    | 0                    |
| <i>trnH(gug)</i>  | 0            | 0            | 0            | 0                    | 0                    | 0                    |
| <i>trnI(cau)</i>  | 0            | 0            | 0            | 2                    | 0                    | 0                    |
| <i>trnI(gau)</i>  | 0            | 0            | 0            | 2                    | 5                    | 6                    |
| <i>trnK(uuu)</i>  | 0            | 0            | 0            | 0                    | 0                    | 0                    |
| <i>trnL(uaa)</i>  | 0            | 0            | 0            | 0                    | 0                    | 0                    |
| <i>trnL(uag)</i>  | 0            | 0            | 0            | 0                    | 0                    | 1                    |
| <i>trnM(cau)</i>  | 0            | 0            | 0            | 16                   | 26                   | 48                   |
| <i>trnM(cau)</i>  | 0            | 0            | 0            | 1                    | 2                    | 14                   |

|                  |   |   |   |    |    |     |
|------------------|---|---|---|----|----|-----|
| <i>trnN(guu)</i> | 0 | 0 | 0 | 1  | 0  | 1   |
| <i>trnP(ugg)</i> | 0 | 0 | 0 | 0  | 0  | 0   |
| <i>trnQ(uug)</i> | 0 | 0 | 0 | 9  | 5  | 14  |
| <i>trnR(ucg)</i> | 0 | 0 | 0 | 0  | 0  | 1   |
| <i>trnR(ucu)</i> | 0 | 0 | 0 | 0  | 1  | 5   |
| <i>trnS(gct)</i> | 0 | 0 | 0 | 6  | 15 | 32  |
| <i>trnS(tga)</i> | 0 | 0 | 0 | 0  | 0  | 0   |
| <i>trnV(uac)</i> | 0 | 0 | 0 | 54 | 81 | 121 |
| <i>trnW(cca)</i> | 0 | 0 | 0 | 0  | 0  | 0   |
| <i>trnY(gua)</i> | 0 | 0 | 0 | 0  | 0  | 2   |

**Supplementary Table S4.** Count tables for raw RNA sequencing reads for strains with either the pTP-PCR C2.1 plasmid or vector backbone alone (pPtGE31). Raw counts were enumerated by mapping against the appropriate reference and counted using HTSeq using –nonunique all mode. Three biological replicates were performed (repA, repB, repC) for each condition. Genes regions were counted for the features.

| Genes            | pPtGE31 repA | pPtGE31 repB | pPtGE31 repC | pTP-PCR C2.1<br>repA | pTP-PCR C2.1<br>repB | pTP-PCR C2.1<br>repC |
|------------------|--------------|--------------|--------------|----------------------|----------------------|----------------------|
| <i>CAT</i>       | 2224         | 4737         | 3625         | 1856                 | 1439                 | 4337                 |
| <i>atp6</i>      | 0            | 0            | 0            | 0                    | 0                    | 1                    |
| <i>atp8</i>      | 0            | 0            | 0            | 0                    | 0                    | 0                    |
| <i>atp9</i>      | 0            | 0            | 0            | 0                    | 0                    | 1                    |
| <i>cob</i>       | 0            | 0            | 0            | 10                   | 3                    | 13                   |
| <i>cox1</i>      | 0            | 0            | 0            | 427                  | 463                  | 914                  |
| <i>orf718</i>    | 0            | 0            | 0            | 402                  | 438                  | 883                  |
| <i>cox2</i>      | 0            | 0            | 0            | 2                    | 0                    | 3                    |
| <i>cox3</i>      | 0            | 0            | 0            | 11                   | 12                   | 27                   |
| <i>nad1</i>      | 0            | 0            | 0            | 2                    | 0                    | 2                    |
| <i>nad11</i>     | 0            | 0            | 0            | 2                    | 0                    | 2                    |
| <i>nad2</i>      | 0            | 0            | 0            | 0                    | 1                    | 1                    |
| <i>nad3</i>      | 0            | 0            | 0            | 1                    | 0                    | 1                    |
| <i>nad4</i>      | 0            | 0            | 0            | 1                    | 0                    | 3                    |
| <i>nad4L</i>     | 0            | 0            | 0            | 0                    | 0                    | 0                    |
| <i>nad5</i>      | 0            | 0            | 0            | 5                    | 2                    | 5                    |
| <i>nad6</i>      | 0            | 0            | 0            | 1                    | 0                    | 6                    |
| <i>nad7</i>      | 0            | 0            | 0            | 46                   | 27                   | 38                   |
| <i>nad9</i>      | 0            | 0            | 0            | 0                    | 0                    | 0                    |
| <i>rpl14</i>     | 0            | 0            | 0            | 0                    | 0                    | 6                    |
| <i>rpl16</i>     | 0            | 0            | 0            | 0                    | 5                    | 1                    |
| <i>rpl2</i>      | 0            | 0            | 0            | 1                    | 12                   | 8                    |
| <i>rpl5</i>      | 0            | 0            | 0            | 0                    | 0                    | 1                    |
| <i>rpl6</i>      | 0            | 0            | 0            | 0                    | 0                    | 0                    |
| <i>rps10</i>     | 0            | 0            | 0            | 0                    | 0                    | 0                    |
| <i>rps11</i>     | 0            | 0            | 0            | 0                    | 0                    | 0                    |
| <i>rps12</i>     | 0            | 0            | 0            | 4                    | 0                    | 0                    |
| <i>rps13</i>     | 0            | 0            | 0            | 1                    | 0                    | 1                    |
| <i>rps14</i>     | 0            | 0            | 0            | 0                    | 0                    | 0                    |
| <i>rps19</i>     | 0            | 0            | 0            | 1                    | 9                    | 3                    |
| <i>rps2</i>      | 0            | 0            | 0            | 0                    | 0                    | 0                    |
| <i>rps3</i>      | 0            | 0            | 0            | 1                    | 0                    | 0                    |
| <i>rps4</i>      | 0            | 0            | 0            | 0                    | 0                    | 0                    |
| <i>rps7</i>      | 0            | 0            | 0            | 0                    | 0                    | 1                    |
| <i>rps8</i>      | 0            | 0            | 0            | 0                    | 0                    | 0                    |
| <i>rrnS</i>      | 0            | 0            | 0            | 23                   | 17                   | 36                   |
| <i>rrnL</i>      | 0            | 0            | 0            | 70                   | 46                   | 112                  |
| <i>tatC</i>      | 0            | 0            | 0            | 2                    | 0                    | 1                    |
| <i>trnA(ugc)</i> | 0            | 0            | 0            | 1                    | 0                    | 0                    |
| <i>trnC(gca)</i> | 0            | 0            | 0            | 0                    | 0                    | 0                    |
| <i>trnD(guc)</i> | 0            | 0            | 0            | 0                    | 0                    | 0                    |
| <i>trnE(uuc)</i> | 0            | 0            | 0            | 0                    | 0                    | 2                    |
| <i>trnF(gaa)</i> | 0            | 0            | 0            | 0                    | 0                    | 0                    |
| <i>trnG(gcc)</i> | 0            | 0            | 0            | 0                    | 0                    | 1                    |
| <i>trnH(gug)</i> | 0            | 0            | 0            | 0                    | 0                    | 0                    |
| <i>trnI(cau)</i> | 0            | 0            | 0            | 2                    | 0                    | 0                    |
| <i>trnI(gau)</i> | 0            | 0            | 0            | 0                    | 0                    | 0                    |
| <i>trnK(uuu)</i> | 0            | 0            | 0            | 0                    | 0                    | 1                    |
| <i>trnL(uaa)</i> | 0            | 0            | 0            | 0                    | 0                    | 0                    |
| <i>trnL(uag)</i> | 0            | 0            | 0            | 1                    | 0                    | 0                    |
| <i>trnM(cau)</i> | 0            | 0            | 0            | 7                    | 4                    | 15                   |
| <i>trnN(guu)</i> | 0            | 0            | 0            | 1                    | 0                    | 0                    |
| <i>trnP(ugg)</i> | 0            | 0            | 0            | 0                    | 0                    | 0                    |

|                  |   |   |   |   |   |   |
|------------------|---|---|---|---|---|---|
| <i>trnQ(uug)</i> | 0 | 0 | 0 | 0 | 0 | 1 |
| <i>trnR(ucg)</i> | 0 | 0 | 0 | 0 | 0 | 1 |
| <i>trnR(ucu)</i> | 0 | 0 | 0 | 0 | 0 | 0 |
| <i>trnS(gct)</i> | 0 | 0 | 0 | 1 | 0 | 2 |
| <i>trnS(tga)</i> | 0 | 0 | 0 | 1 | 0 | 0 |
| <i>trnV(uac)</i> | 0 | 0 | 0 | 0 | 0 | 1 |
| <i>trnW(cca)</i> | 0 | 0 | 0 | 1 | 0 | 1 |
| <i>trnW(uca)</i> | 0 | 0 | 0 | 0 | 0 | 1 |
| <i>trnY(gua)</i> | 0 | 0 | 0 | 0 | 0 | 0 |

**Supplementary Note S1.** Determination of outliers in the calculation of doubling time for *E. coli* strains. The median of the dataset was calculated, as well as the lower (Q1) and upper (Q3) quartiles representing that data points at which 25% of the data falls below and above, respectively. The interquartile range ( $IQR = Q3 - Q1$ ) that indicates the boundaries of non-outlier data points was then calculated. Next, the inner fence of the dataset was found by multiplying IQR by 1.5, then subtracting that value from Q1 and adding it to Q3. Any point outside the inner fence is considered a minor outlier. The outer fence of the dataset was found by multiplying IQR by 3, then subtracting that value from Q1 and adding it to Q3. Any data point outside the outer fence is considered a major outlier. Here, we have only omitted major outliers from our determination of doubling time.
